# Supplementary material
Source: Springer Nature journal article supplement (https://www.springermedizin.de/resource/supplementary/13633_2014_352_MOESM8_ESM.pdf/9596138)

# Analysis of Intent to Treat with Growth Hormone to Adult Height

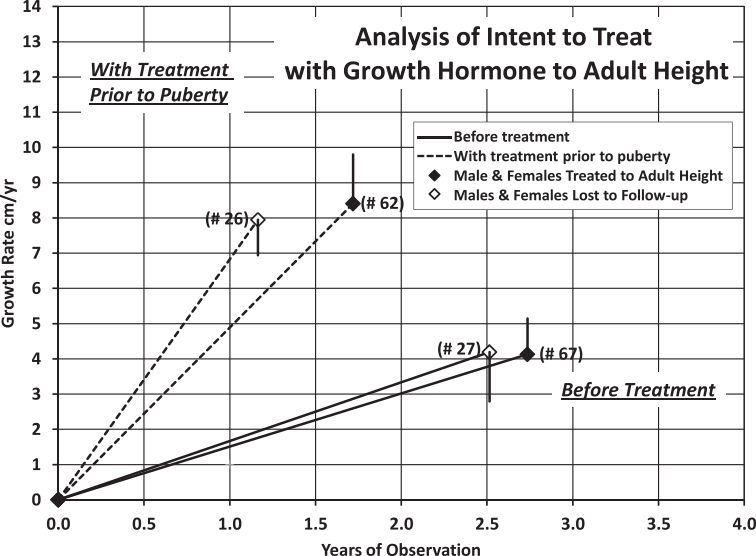

Supplement: MOESM8 [file 9596138]
